1 **Tract-based white matter hyperintensity patterns in patients with Systemic Lupus**  
2 **Erythematosus using an unsupervised machine learning approach.**

3  
4 Theodor Rumetshofer<sup>\*1†</sup>, Francesca Inglese<sup>2†</sup>, Jeroen de Bresser<sup>2</sup>, Peter Mannfolk<sup>3</sup>, Olof  
5 Strandberg<sup>4</sup>, Andreas Jönsen<sup>5</sup>, Anders Bengtsson<sup>5</sup>, Markus Nilsson<sup>1</sup>, Linda Knutsson<sup>6,7,8</sup>,  
6 Jimmy Lätt<sup>3</sup>, Gerda M. Steup-Beekman<sup>9</sup>, Tom W.J. Huizinga<sup>9</sup>, Mark A. van Buchem<sup>2</sup>, Itamar  
7 Ronen<sup>10,‡</sup> and Pia C. Sundgren<sup>1,3,11,‡</sup>

8  
9 <sup>1</sup>*Department of Clinical Sciences Lund/Diagnostic Radiology, Lund University, Lund, Sweden*

10 <sup>2</sup>*Department of Radiology, Leiden University Medical Center, Leiden, Netherlands*

11 <sup>3</sup>*Department of Medical Imaging and Physiology, Skåne University Hospital, Lund, Sweden*

12 <sup>4</sup>*Department of Clinical Sciences Malmö/ Clinical Memory Research Unit, Lund University,*  
13 *Lund, Sweden*

14 <sup>5</sup>*Department of Clinical Sciences Lund/ Rheumatology, Lund University, Skåne University*  
15 *Hospital, Lund, Sweden*

16 <sup>6</sup>*Department of Medical Radiation Physics, Lund University, Lund, Sweden*

17 <sup>7</sup>*Russell H. Morgan Department of Radiology and Radiological Science, Johns Hopkins*  
18 *University School of Medicine, Baltimore, MD, US*

19 <sup>8</sup>*F.M. Kirby Research Center for Functional Brain Imaging, Kennedy Krieger Research*  
20 *Institute, Baltimore, MD, US.*

21 <sup>9</sup>*Department of Rheumatology, Leiden University Medical Center, Leiden, Netherlands*

22 <sup>10</sup>*Clinical Imaging Science Center, Brighton and Sussex Medical School, University of*  
23 *Brighton, UK*

24 <sup>11</sup>*Lund University BioImaging Center, Lund University, Lund, Sweden*

25  
26 \*Correspondence:

27 Theodor Rumetshofer

28 [theodor.rumetshofer@med.lu.se](mailto:theodor.rumetshofer@med.lu.se)

29 ORCID: 0000-0002-0778-0703

30  
31 † T Rumetshofer and F Inglese have contributed equally to this work and share first  
32 authorship

33 ‡ I Ronen and PC Sundgren have contributed equally to this work and share senior  
34 authorship.

35  
36  
37 **KEYWORDS**

38 Magnetic resonance imaging, Cluster analysis, White matter hyperintensities, Systemic lupus  
39 erythematosus, Rare diseases

40  
41  
42 **FORMAT**

43 Article

46 **ABSTRACT**

47

48 Currently, little is known about the spatial distribution of white matter hyperintensities (WMH)  
49 in the brain of patients with Systemic Lupus erythematosus (SLE). Previous lesion markers,  
50 such as number and volume, ignore the strategic location of WMH. The goal of this work was  
51 to develop a fully-automated method to identify predominant patterns of WMH across WM  
52 tracts based on cluster analysis. A total of 221 SLE patients with and without neuropsychiatric  
53 symptoms from two different sites were included in this study. WMH segmentations and lesion  
54 locations were acquired automatically. Cluster analysis was performed on the WMH  
55 distribution in 20 WM tracts. Our pipeline identified five distinct clusters with predominant  
56 involvement of the forceps major, forceps minor, as well as right and left anterior thalamic  
57 radiations and the right inferior fronto-occipital fasciculus. The patterns of the affected WM  
58 tracts were consistent over the SLE subtypes and sites. Our approach revealed distinct and  
59 robust tract-based WMH patterns within SLE patients. This method could provide a basis, to  
60 link the location of WMH with clinical symptoms. Furthermore, it could be used for other  
61 diseases characterized by presence of WMH to investigate both the clinical relevance of WMH  
62 and underlying pathomechanism in the brain.

63

64

65

## 66 1. INTRODUCTION

67 White matter hyperintensities (WMH) are lesions in the white matter (WM) appearing  
68 hyperintense on T<sub>2</sub>-weighted MRI images<sup>1</sup>. The prevalence of WMH in the general population  
69 increases with age<sup>1</sup>. WMH are considered as important neuroimaging and clinical markers in  
70 many neurological diseases<sup>2</sup>. However, the pathogenesis of WMH is not well understood and  
71 may have various etiologies. The prevalence of WMH is highly variable within and across  
72 different diseases<sup>2,3</sup>. WMH are one of the main imaging findings observed in the brain in  
73 systemic lupus erythematosus (SLE) patients<sup>4</sup>, even though not all SLE patients manifest  
74 WMH<sup>5,6</sup>. SLE is a rare autoimmune disease affecting mostly women and it is characterized by  
75 the production and deposition of several autoantibodies. SLE involves different organs,  
76 including the central nervous system, in which damage could lead to neuropsychiatric (NP)  
77 syndromes<sup>6</sup>. The American College of Rheumatology (ACR) describes 19 NP syndromes  
78 that could be present in SLE patients. These ACR criteria also subdivide SLE patients  
79 experiencing NP events in two subgroups based on the attribution of NP events directly related  
80 to the disease (NPSLE) or other causes (non-NPSLE)<sup>7,8</sup>. In clinical practice, however, the  
81 attribution process of the NP events to the disease is difficult as the nature of NP syndromes is  
82 highly heterogeneous and ranges from mild (e.g. headache and anxiety) to major symptoms  
83 (e.g. seizures and psychosis)<sup>9</sup>. In addition, there are large differences in the NP attribution  
84 across sites and across studies (between 37% and 95%)<sup>4</sup>, illustrating the difficulty in  
85 establishing a rigorous standard for the attribution of NP to SLE<sup>10</sup>. We used the term NPSLE  
86 to refer to patients with NP manifestations attributed to SLE and the term non-NPSLE to  
87 patients with NP manifestations not attributed to SLE.

88  
89 The origin of WMH in SLE is not fully understood, but could be the result of inflammatory and  
90 immunologically mediated small vessel disease (SVD)<sup>3</sup>. The location of WMH in white matter  
91 has been shown to be of major importance in several neurological diseases. In multiple sclerosis  
92 (MS) and Alzheimer's disease it has been demonstrated that WMH location is more strongly  
93 linked to neuropsychological impairment than WMH volume and count<sup>11,12,13</sup>. WMH location  
94 in patients with arterial diseases can provide prognostic survival information<sup>14</sup>. WMH in SLE  
95 patients has not been shown to be homogeneous across subgroups<sup>15</sup>. One study reported that  
96 the prevalence of WMH in the splenium of the corpus callosum, in the right superior  
97 longitudinal fasciculus and in some small clusters in the right corona radiata was higher in  
98 NPSLE patients compared to SLE patients without NP involvement<sup>16</sup>. Another study reported  
99 high WMH burden in the superior longitudinal fasciculus and anterior corona radiata in NPSLE  
100 as well as in SLE patients without NP involvement<sup>17</sup>. All previous assessments of WMH burden  
101 on specific white matter tracts in SLE were based on manual WMH segmentation. Although  
102 manual segmentation is often considered as gold standard, it inevitably introduces variability  
103 that can be reduced by devising an automated WMH segmentation pipeline<sup>18,19</sup>. The variability  
104 in results obtained from WMH segmentation algorithms compared to manual segmentation,  
105 seems to depend on WMH burden. However, existing WMH segmentation algorithms are  
106 robust for a wide range of WMH load<sup>20,21,22</sup> and a fully automated pipeline could increase the  
107 level of reproducibility.

108  
109 The goal of our retrospective cross-sectional study was to develop a fully automated method to  
110 characterize the spatial distribution of WMH across WM tracts in SLE patients. Due to the well-  
111 known heterogeneity in diagnosis and difficulties in the attribution of NP manifestations, we  
112 aimed for a highly objective approach by investigating only the spatial distribution of WMH in  
113 the brain. We used an unsupervised machine learning method to identify clusters based on WM  
114 tract-based abnormalities. We addressed the typical paucity of subjects in SLE studies by

115 pooling two cohorts of SLE patients. Further, we investigated if our method is robust across  
116 SLE subgroups and clinical and radiological differences between the sites.

117

118

## 119 2. METHODS

### 120 2.1 Subject population

#### 121 2.1.1 Leiden cohort

122 The Leiden University Medical Center (LUMC) is the national referral center in the  
123 Netherlands for SLE patients experiencing NP symptoms. The SLE patients undergo a one-day  
124 standardized evaluation that includes multidisciplinary medical assessments and  
125 complementary tests, including extensive laboratory tests, neuropsychological testing and a  
126 brain MRI scan<sup>23,24</sup>. All patients are assessed by a rheumatologist, neurologist, psychiatrist,  
127 vascular internal medicine expert and advanced nurse practitioner. This evaluation is followed  
128 by a multidisciplinary consensus meeting in order to decide whether the NP events are  
129 attributable to SLE or not. In the final attribution of NP symptoms to SLE or other etiologies,  
130 several aspects are taken into account: the time between the onset of NP symptoms and  
131 diagnosis of SLE, SLE disease activity, the type of NP symptoms, favoring factors and the  
132 presence of alternative diagnoses<sup>10,25</sup>. NPSLE diagnoses were defined according to the 1999  
133 ACR nomenclature<sup>26</sup>. All patients fulfilled the 1997 revised ACR criteria for the classification  
134 of SLE<sup>27</sup>.

135 From this cohort, 216 patients scanned between May 2007 and April 2015 were eligible.  
136 Information on sex, age, disease duration and age of disease onset was obtained via interview  
137 with the patient and retrieved from electronic medical records. SLE activity and damage  
138 indices were scored for each patient: the SLE disease activity was determined using the  
139 Systemic Lupus Erythematosus Disease Activity Index 2000 (SLEDAI-2K)<sup>28</sup>; SLE irreversible  
140 damage was assessed with the Systemic Lupus International Collaborating Clinics/American  
141 College of Rheumatology damage index (SDI)<sup>8</sup>. The Leiden-The Hague-Delft ethics approval  
142 committee approved the study (registration number P07.177) and all included patients signed  
143 informed consent.

144 All participants were scanned using a Philips Achieva 3T MRI scanner (Philips Healthcare,  
145 Best, The Netherlands) equipped with a body transmit RF coil and an 8-Channel receive head  
146 coil array. A standardized scanning protocol was used. The sequences included in this study  
147 were: a 3D T<sub>1</sub>-weighted scan (voxel size = 1.17 × 1.17 × 1.2 mm<sup>3</sup>; TR/TE = 9.8/4.6 ms) and two  
148 versions of a fluid-attenuated inversion recovery (FLAIR) scan. A total of 99 data sets included  
149 a 2D-multislice FLAIR sequence (voxel size = 1.0 × 1.0 × 3.6 mm<sup>3</sup>;  
150 TR/TE/TI = 10000/120/2800 ms) and 53 data sets included a 3D FLAIR (voxel  
151 size = 1.10 × 1.11 × 0.56 mm<sup>3</sup>; TR/TE/TI = 4800/576/1650 ms) (see Supplementary Table S1  
152 for a summary of the MRI methods). The change from 2D to 3D in the FLAIR protocol occurred  
153 in February 2013.

#### 154 2.1.2 Lund cohort

156 SLE patients experiencing NP symptoms were recruited by the Department of Rheumatology  
157 in Lund, Skåne University Hospital, Sweden. Inclusion criteria were: female sex, age between  
158 18 and 55 years and right handedness. Patients with any contraindication to MRI or pregnancy  
159 were not asked to participate in this study. All patients fulfilled the SLICC classification criteria  
160 for SLE<sup>29</sup>. Extensive laboratory and neuropsychological testing were performed in the Lund  
161 cohort as well. The brain MRI scan was performed on the same day as the clinical visit with  
162 few exceptions due to logistical issues (maximum of 2 weeks in difference, e.g. patients  
163 requested another time slot). The collected clinical data and the NP symptoms, as defined by  
164 the American College of Rheumatology (ACR) case definition for NPSLE<sup>26</sup>, were evaluated by  
165 a rheumatologist and a neurologist. In case of split opinions, a consensus meeting followed.  
166 In the Lund cohort, 73 subjects, recruited consecutively from January 2013 to January 2016,  
167 were eligible for this study. All participants underwent rheumatologic and standardized  
168 neurologic clinical assessment. Information about SLE disease activity and organ damage were

169 recorded according to the SLE disease Activity Index 2000 (SLEDAI-2k)<sup>28</sup> and the Systemic  
170 Lupus Erythematosus International Collaborating Clinics / ACR Damage Index (SLICC/ACR-  
171 DI)<sup>8</sup>. The Regional Ethical Review Board in Lund, Sweden (#2012/4, #2014/748) approved  
172 this study and a written informed consent was obtained for all subjects prior to inclusion.  
173 All participants underwent a brain scan on a 3T MRI Siemens scanner (Siemens MAGNETOM  
174 Skyra, Erlangen, Germany). Imaging protocols included in this study were: T<sub>1</sub>-weighted  
175 magnetization-prepared rapid gradient-echo (MPRAGE) (1 mm isotropic voxels, TR/TE =  
176 1900/2.54 ms) and 2D-multislice T<sub>2</sub>-weighted FLAIR (0.7x0.7x3.0 mm, TR/TE/TI =  
177 9000/81/2500 ms) (see Supplementary Table S1).

## 178 179 **2.2 Cluster analysis**

180 The preprocessing of image data, prior to cluster analysis is shown in Figure 1. A detailed  
181 description of all preprocessing steps can be found in the Supplementary Material (Material  
182 Section). For the cluster analysis, the WMH burden on each WM tract was L2-normalized (unit  
183 norm) to obtain an individual WMH pattern for each subject. All subjects were included in this  
184 analysis without giving any information about clinical diagnose, site or NP manifestations.  
185 Hierarchical clustering (Ward's method)<sup>30</sup> was applied to the L2-normalized WMH load from  
186 20 WM tracts (based on the JHU WM atlas) and a total of 186 SLE patients, resulting in 186  
187 feature vectors with 20 values. SLE patients without detectable WMH (n=35) were not included  
188 in the clustering but were included in the statistics. The cluster analysis and the performance  
189 evaluation of the clustering procedure was performed with scikit-learn 0.20.3  
190 (RRID:SCR\_002577)<sup>31</sup>.

191 Agglomerative hierarchical clustering successively merges groups of subjects (starting with  
192 each subject in its own group) based on the Euclidean distance between their WMH feature  
193 vector, until all subjects form a single cluster. The successive merging of subgroups results in  
194 a tree structure, or *dendrogram*, shown in Supplementary Figure S1. The iterative calculation  
195 of inter-cluster distances was computed using Ward's method, resulting in minimal intra-cluster  
196 variance. Each node or branching point of the tree corresponds to the merging of two clusters,  
197 for which the corresponding inter-cluster distance is shown on the y-axis. To estimate the  
198 optimal number of clusters, the dendrogram has to be cut at a certain distance threshold. The  
199 optimal cluster number was evaluated by a consensus of two different methods: Silhouette  
200 Coefficient<sup>32</sup> and the Calinski-Harabasz index<sup>33</sup>.

201 To evaluate the robustness of the method, three sensitivity analyses were performed. In the first  
202 one, cluster analysis was performed on each SLE subgroup. The second sensitivity analysis was  
203 implemented separately on the Lund and Leiden cohorts. The last sensitivity analysis was  
204 performed by clustering the total SLE patients using as a regressor the site (Lund, Leiden)  
205 including: sex, type of FLAIR (2D, 3D), age, disease duration, SDI-score, SLEDAI-2k-score,  
206 and WMH total volume.

## 207 208 **2.3 Statistical analysis**

209 The between-group and cohort differences in demographic and clinical data, were assessed for  
210 nominal variables with Chi-square test and for continuous variables based on their non-normal  
211 distribution with Mann-Whitney U test. Differences between clusters were estimated for  
212 nominal variables with Chi-square test and for continuous variables with non-parametric  
213 Kruskal-Wallis test. Post-hoc pairwise comparisons of the clusters were performed with Mann-  
214 Whitney U-test and using Bonferroni multiple comparison correction. Data are represented as  
215 number (percentage) or median (10-90 percentile). All statistical analyses as well as tests for  
216 distribution normality (D'Agostino and Pearson's test) were performed using Python package  
217 Scipy 1.2.1 (RRID:SCR\_008058)<sup>34</sup>. Covariates correction was performed with a general linear  
218 model (GLM) using Python package statsmodels 0.10.1 (RRID:SCR\_016074)<sup>35</sup>.

## 219 **3. RESULTS**

### 220 **3.1 Demographic and clinical data**

221 From the Leiden cohort, 216 patients were eligible for this study. Of these, 28 patients were  
222 excluded because of undefined and mixed subgroups, 8 for misdiagnosis established during a  
223 follow-up visit, 3 patients for motion artefacts in the MRI scans, 3 patients for co-registration  
224 failure of the T1 and FLAIR images using the LST-LGA toolbox, 20 patients for the presence  
225 of brain infarcts over 1.5 cm that hindered accurate brain volume measurements and 2 patients  
226 were removed due to the presence of other diseases (brain tumor and large arachnoid cyst). This  
227 resulted in a total of 152 patients included in the present study, comprising 37 NPSLE and 115  
228 non-NPSLE patients.

229 From the Lund cohort, 73 subjects were eligible for this study. A total of 4 subjects were  
230 excluded due to misdiagnosis, temporal lobe resection, hypothyroidism and co-registration  
231 failure of the LST-LGA toolbox. In total, 69 patients were included in the present study,  
232 comprising 42 NPSLE and 27 non-NPSLE.

233 Table 1 shows clinical and demographic data of the two different cohorts (Leiden/NL and  
234 Lund/SWE). Statistically significant differences were observed in sex, age, disease duration,  
235 age of onset, SLE disease scores, ACR criteria, volume and number of WMH ( $p < 0.05$ ).

236 An overview of the cerebrovascular risk factors, ongoing pharmacologic treatments as well as  
237 antibodies can be found in Supplementary Table S2.

238 From both cohorts, a total of 221 data sets were analyzed in this study, of which 79 were NPSLE  
239 and 142 were non-NPSLE. Supplementary Table S3 includes demographic and clinical data for  
240 the two subgroups. No significant differences were found between the two groups in  
241 demographic and clinical variables.

### 242 **3.2 Cluster analysis**

243 The cluster analysis was performed on all patients and yielded in five distinct clusters (Figure  
244 2): cluster 1 ( $n=52$ ) is mainly assigned to the forceps major and to lesser extent to the left and  
245 right inferior fronto-occipital fasciculus; cluster 2 ( $n=57$ ) mainly to the right anterior thalamic  
246 radiation and to lesser extent to the forceps minor and the right inferior fronto-occipital  
247 fasciculus; cluster 3 ( $n=23$ ) to the forceps minor; cluster 4 ( $n=30$ ) to the left anterior thalamic  
248 radiation and to lesser extent to the forceps minor and the right anterior thalamic radiation;  
249 and cluster 5 ( $n=24$ ) was more heterogeneous in terms of location in WM tracts but it could be  
250 mainly assigned to the right inferior fronto-occipital fasciculus. A total of 35 patients (8 NPSLE,  
251 27 non-NPSLE) with no WMH were excluded from cluster analysis. The lesion frequency maps  
252 (Figure 3) show the WMH location probability in each cluster.

253 Patient age, volume and number of WMH lesions were statistically significantly different across  
254 clusters ( $p=0.005$ ,  $p=0.008$  and  $p=0.003$  respectively). After correction for multiple testing,  
255 patient age was significantly higher ( $p=0.002$ ) in cluster 5 compared to patients without  
256 detectable WMH. WMH volume and number in cluster 4 was significantly higher than in cluster  
257 3 ( $p < 0.001$ ) and number of lesions was significantly higher in cluster 2 compared to cluster 3  
258 ( $p=0.001$ ) (Supplementary Table S4).

### 260 **3.3 Performance evaluation of the cluster analysis**

261 The cluster analysis was evaluated through a consensus of two different methods. The  
262 Silhouette coefficient and Calinski-Harabaz index showed a clear peak using five clusters  
263 (Figure 4). Although the Silhouette coefficient seems to increase with higher cluster size (with  
264 local maximum for 5 clusters), the Calinski-Harabaz index sharply decreases with increasing  
265 number of clusters, therefore  $n(\text{clusters}) = 5$  was chosen for best performance.

### 266 **3.4 Sensitivity analysis**

269 Sensitivity analysis was implemented in three different ways. The first sensitivity analysis was  
270 performed separately on each of the two subgroups of SLE patients: NPSLE and non-NPSLE.  
271 This resulted in an overlap of the number of the same patients included in a certain cluster of  
272 83% for the NPSLE group and 85% for the non-NPSLE group, when compared to the main  
273 analysis where all SLE patients were included. The cluster analysis on NPSLE patients resulted  
274 in 6 clusters. Similarly to the cluster analysis performed on the entire group, clusters 1, 2, 3 and  
275 5 were mainly assigned to specific WM tracts: forceps major, right anterior thalamic radiation,  
276 forceps minor and left anterior thalamic radiation, respectively. Cluster 4 consisted of two  
277 subjects and was attributed to the left inferior fronto-occipital fasciculus. Cluster 6 was more  
278 heterogeneous in terms of WM tract location and was comparable to cluster 5 of the main  
279 analysis (Figure 5). The corresponding NP manifestations in the NPSLE subgroup showed no  
280 correlation with the unveiled clusters (Supplementary Figure S2). The cluster analysis on non-  
281 NPSLE patients revealed 5 clusters. Clusters 1, 2, 3 and 4 could be mainly assigned to the same  
282 specific WM tracts identified in the main cluster analysis: forceps major, forceps minor, right  
283 anterior thalamic radiation and left anterior thalamic radiation, respectively. Similar to the  
284 NPSLE subgroup clustering, cluster 5 was more heterogeneous in terms of WM tract location  
285 and comparable to cluster 5 of the main analysis (Figure 5).

286 The second sensitivity analysis was performed on each site separately (Figure 6). Compared to  
287 the main analysis, the overlap of the same patients in the certain clusters resulted in 93% for  
288 the Lund cohort and 87% for the Leiden cohort. The four clusters revealed from clustering the  
289 Lund cohort separately, can be assigned to the right anterior thalamic radiation, the forceps  
290 minor, the forceps major, similar to the main analysis, and a heterogeneous cluster in terms of  
291 the affected tracts, similar to the cluster 5 in the main analysis. The five clusters revealed from  
292 clustering the Leiden cohort separately can be assigned to the forceps major, the forceps minor  
293 and the left and right anterior thalamic radiation, similar to the main analysis, and a  
294 heterogeneous cluster in terms of the affected tracts, similar to cluster 5 in the main analysis.

295 The third and last sensitivity analysis was performed on the entire SLE population using as  
296 regressors the site and the significant differences between the cohorts: sex, type of FLAIR, age,  
297 disease duration, SDI-score, SLEDAI-2k-score and the WMH total volume using a general  
298 linear model (GLM). The resulting clusters showed an overlap of 90% with those obtained by  
299 the main analysis (Figure 7). Cluster 1 to 4 could be mainly assigned to specific WM tracts:  
300 forceps major, right anterior thalamic radiation, forceps minor and left anterior thalamic  
301 radiation, respectively. Cluster 5 was more heterogeneous in terms of WM tract location and  
302 was comparable to cluster 5 of the main analysis.

303

### 304 **3.5 Volumetric analysis of the WMH**

305 The distributions of the WMH volumes on each WM tract for each cluster on the total SLE  
306 population are given in Supplementary Table S5. With the exception of the right corticospinal  
307 tract and the left cingulum cingulate gyrus, statistically significant differences in WMH  
308 volumes were found in all WM tracts, across all five clusters. The main WM tract assigned to  
309 each cluster shows also the highest volume.

310 The WMH volume was significantly higher in NPSLE patients compared to non-NPSLE  
311 patients in the right anterior thalamic radiation ( $p=0.024$ ), in the right inferior fronto-occipital  
312 fasciculus ( $p=0.010$ ), in the right inferior longitudinal fasciculus ( $p=0.041$ ) and in the right  
313 uncinata fasciculus ( $p=0.033$ ) (Supplementary Table S6).

314

315

316



#### 317 **4. DISCUSSION**

318 We developed a fully automated method to unveil WMH pattern in SLE patients experiencing  
319 NP events. We applied this method on a two-center dataset of SLE patients. Our method  
320 detected five robust and distinct clusters, characterized by the involvement of the forceps major,  
321 forceps minor as well as the left and right anterior thalamic radiation and the right inferior  
322 fronto-occipital fasciculus (Figures 2 and 3). Our results are consistent across the two  
323 subgroups, NPSLE and non-NPSLE patients (Figure 4). Despite the heterogeneity of the  
324 disease, our results are consistent across both sites (Figure 6) and are not affected by the clinical  
325 and radiological differences between the two cohorts (Figure 7). Differences in volume and  
326 number of WMHs were observed between the clusters and subgroups as presented in the  
327 Supplementary Tables S5 and S6.

328 Cluster analysis has been applied successfully to identify distinct clusters based on coarse  
329 location of WMH in other brain disorders, such as arterial disease<sup>36</sup> and postoperative  
330 delirium<sup>37</sup>. So far, unsupervised machine learning approaches based on structural MRI  
331 information were not explored in research involving SLE patients<sup>5,6</sup>. To the best of our  
332 knowledge, the work we present here is the first machine learning analysis that focuses on brain  
333 features gauged by MRI in SLE. Compared to previous studies<sup>16,17</sup>, in our developed method  
334 the WMH were detected and assigned to WM tracts automatically by using a well-established  
335 lesion segmentation algorithm and further processed by publicly available software<sup>38</sup>. Further,  
336 the L2-normalization highlighted the underlying WMH pattern for each patient by reducing the  
337 impact of the total WMH burden and harmonizing the two-sites dataset. These steps, in  
338 combination with a machine learning technique unveiled a consistent spatial pattern of the  
339 mainly affected WM tracts. Few studies applied cluster analysis in SLE but those are based on  
340 clinical features, such as demographic<sup>39</sup>, genetic<sup>40</sup> and autoantibodies<sup>41</sup> data.. In contrast, our  
341 developed approach focuses on MRI brain features which could provide a basis to link  
342 neuroimaging findings to clinical symptoms.

343  
344 Several studies in other diseases, such as Alzheimer's disease and MS showed the importance  
345 to categorize spatially WMH to the link with neuropsychological impairment<sup>12,13</sup>. Previous  
346 studies in SLE patients showed higher prevalence of WMH on specific WM tracts<sup>16,17,42,43,44</sup>.  
347 However, manual segmentation of the WMH and their subsequent ways to assign WMH to  
348 specific WM tracts may have influenced the reproducibility of the study and make it difficult  
349 to compare them with our approach. Furthermore, these studies included also SLE patients  
350 without any NP syndromes, a subgroup which was not included in the present study<sup>16,17</sup>. Our  
351 method identified a set of WM tracts with the highest lesion volume, which seem to be those  
352 most significantly involved in our SLE patients experiencing NP manifestations. In healthy  
353 elderly, WMH on tracts adjacent to the frontal horns of lateral ventricles, such as the left and  
354 right anterior thalamic radiation, are associated with worse performance in executive  
355 function<sup>45,46</sup> and planning complex behavior<sup>46</sup>. Indeed, decrease of complex planning behavior  
356 performance is shown in SLE patients<sup>47</sup>. Microstructural WM abnormalities in forceps minor  
357 are higher in patient with Schizophrenia compared to controls<sup>48</sup> and are related to depression  
358 and fatigue in MS<sup>49</sup>. Furthermore, both anterior thalamic radiation and forceps minor are linked  
359 to cognitive impairment in patients with SVD<sup>50</sup>. Since the importance of the frontal WM tracts  
360 in cognition and psychiatric disorder, future studies are needed to fully understand the role that  
361 the tracts we found in this study may play in the performance of NPSLE patients.

362 All SLE patients, except those without detectable WMH, were included in the cluster analysis  
363 without considering the subgroups or the affiliation to cohorts. The attribution process of the  
364 NP events is difficult since the nature of NP syndromes is heterogeneous (can vary from  
365 headache and seizures to anxiety and psychosis)<sup>9</sup> and there are large differences in the NP  
366 attribution across studies (between 37% and 95%)<sup>4</sup>. It has been demonstrated that

367 misclassification of NP events may occur in clinical practice with an over attribution of NP to  
368 the disease (NPSLE)<sup>51</sup>. Several challenges are related to the diagnostic procedure of NPSLE.  
369 First, SLE is categorized as a rare disease (prevalence 1-5/10 000, source [www.orpha.net](http://www.orpha.net)) and  
370 many SLE studies suffer from small sample sizes<sup>5,52</sup>, hampers to draw conclusions regarding  
371 the reliability and robustness of results. To overcome this problem, we performed a two site  
372 study. Second, the absence of biomarkers (radiological or laboratory) reliable enough in the  
373 diagnostic process make it difficult to create a link between radiological findings and clinical  
374 symptoms (clinic-radiological paradox)<sup>5</sup>.

375 In this study we could not find an association between the NP manifestations and the clusters  
376 in the NPSLE subgroup. We assume that the reason for this lies in the strong variability of NP  
377 manifestations between the two clinical cohorts (Supplementary Figure S2) and in the highly  
378 heterogenous nature of NP syndromes. Even though NPSLE patients showed higher WMH  
379 volume in some WM tracts compared to non-NPSLE patients, the cluster analysis showed that  
380 the WM tracts most affected by WMH are similar in both subgroups. This suggests that location  
381 and pattern of WMH have no correlation with NPSLE diagnosis and attribution to the disease.  
382 Therefore, location may give a new important information about WMH in SLE. Describing  
383 WMH only in terms of volume or number may not give enough information about etiology but  
384 in severity. Furthermore, despite the heterogeneity of the NP events within each site and the  
385 diagnostic, clinical and radiological variability across sites, our results appeared to be robust  
386 and stable. This is the first comprehensive study to examine WMH in SLE that assesses a broad  
387 categorization of WMH in terms of load, location and volume using a fully automated method  
388 in two site cohort.

389 Our work is not without limitations. Some clusters identified by our method comprise a low  
390 number of patients. This is expected, since SLE is a rare disease, and even with our effort to  
391 increase the patient population by merging data from two centers, the overall number of patients  
392 remains small compared to similar studies performed in more common diseases. A significant  
393 limitation of this study is the lack of a subgroup of SLE patients without NP symptoms. The  
394 lack of such a group stems from the retrospective nature of this study and the lack of availability  
395 of imaging data within our database. Recruiting such a cohort in future studies will undoubtedly  
396 strengthen any conclusion regarding the link between spatial distribution of brain abnormalities  
397 and NP symptoms in SLE, as it has been repeatedly shown that patients with SLE without NP  
398 also exhibit brain abnormalities, albeit to a lesser extent<sup>53</sup>. Further, the focus on structural MRI  
399 information omits the possible impact of clinical features, such as the presence of clinical  
400 activity, antiphospholipid antibodies positivity as well as cardiovascular risk factors and other  
401 factors that were not included in the present analysis. This is a limitation of this study, and  
402 future multicenter studies would benefit from incorporating such data in the analysis.  
403 Additionally, patients for which automated detection of WMH yielded no positive results, were  
404 not included in our analysis. This study was retrospectively performed in prospective cohorts,  
405 therefore differences in MRI protocol, diagnosis definition, and clinical data are present and  
406 can contribute to biases between groups and to an increased variance. The MRI sequences, and  
407 in particular the FLAIR sequences, were different between sites. However, in all our analyses,  
408 subgroups, cohorts and 3D FLAIR scans were not predominant in a specific cluster. Differences  
409 in NP attribution and diagnosis between the two sites, could have had an effect on the results.  
410 However, the sensitivity analysis we performed show that the WMH patterns obtained by our  
411 clustering strategy are robust even when SLE subgroups and cohorts are clustered separately,  
412 or when corrected for significant clinical and radiological differences.

413 To conclude, we developed a method based on an unsupervised machine learning approach and  
414 identified a WMH pattern which was consistent in a two-site cohort. With our approach, we  
415 provided a fully automated standardized method to identify tract-based WMH patterns. The

416 identification of affected WM tracts via the clustering algorithm was robust, despite  
417 heterogeneity of the NP events and their association with the disease. Allocation of the WMH  
418 burden to the most affected WM tracts could help investigate the link between radiological  
419 findings and clinical symptoms in SLE patients with NP manifestations. In a future study an  
420 association between pathogenesis, overall phenotypes and even genetics would be interesting  
421 to explore.

422

423

424 **REFERENCES**

- 425
- 426 1. Debette, S. & Markus, H. S. The clinical importance of white matter hyperintensities  
427 on brain magnetic resonance imaging: Systematic review and meta-analysis. *BMJ* **341**,  
428 288 (2010).
- 429 2. Wardlaw, J. M. *et al.* Neuroimaging standards for research into small vessel disease  
430 and its contribution to ageing and neurodegeneration. *Lancet Neurol.* **12**, 822–838  
431 (2013).
- 432 3. Pantoni, L. Cerebral small vessel disease: from pathogenesis and clinical characteristics  
433 to therapeutic challenges. *The Lancet Neurology* **9**, 689–701 (2010).
- 434 4. Govoni, M. *et al.* The diagnosis and clinical management of the neuropsychiatric  
435 manifestations of lupus. *J. Autoimmun.* **74**, 41–72 (2016).
- 436 5. Magro-Checa, C., Steup-Beekman, G. M., Huizinga, T. W., van Buchem, M. A. &  
437 Ronen, I. Laboratory and Neuroimaging Biomarkers in Neuropsychiatric Systemic  
438 Lupus Erythematosus: Where Do We Stand, Where To Go? *Front. Med.* **5**, (2018).
- 439 6. Hanly, J. G., Kozora, E., Beyea, S. D. & Birnbaum, J. Review: Nervous System  
440 Disease in Systemic Lupus Erythematosus: Current Status and Future Directions.  
441 *Arthritis Rheumatol.* **71**, 33–42 (2019).
- 442 7. Ainiala, H., Loukkola, J., Peltola, J., Korpela, M. & Hietaharju, A. The prevalence of  
443 neuropsychiatric syndromes in systemic lupus erythematosus. *Neurology* **57**, 496–500  
444 (2001).
- 445 8. Gladman, D. D. *et al.* The Systemic Lupus International Collaborating  
446 Clinics/American College of Rheumatology (SLICC/ACR) Damage Index for systemic  
447 lupus erythematosus international comparison. *J. Rheumatol.* **27**, 373–376 (2000).
- 448 9. Hanly, J. G. Diagnosis and management of neuropsychiatric SLE. *Nat. Rev.*  
449 *Rheumatol.* **10**, 338–347 (2014).
- 450 10. Bortoluzzi, A. *et al.* Development and validation of a new algorithm for attribution of  
451 neuropsychiatric events in systemic lupus erythematosus. *Rheumatol. (United*  
452 *Kingdom)* **54**, 891–898 (2014).
- 453 11. Preziosa, P. *et al.* Structural MRI correlates of cognitive impairment in patients with  
454 multiple sclerosis: A Multicenter Study Structural MRI Correlates of Cognitive  
455 Impairment in Patients With Multiple Sclerosis: A Multicenter Study Cognitive  
456 Impairment and Brain Damage in . *Hum. Brain Mapp.* **37**, 1627–1644 (2016).
- 457 12. Meijer, K. A., Steenwijk, M. D., Douw, L., Schoonheim, M. M. & Geurts, J. J. G.  
458 Long-range connections are more severely damaged and relevant for cognition in  
459 multiple sclerosis. *Brain* **143**, 150–160 (2020).
- 460 13. Taylor, A. N. W. *et al.* Tract-specific white matter hyperintensities disrupt neural  
461 network function in Alzheimer’s disease. *Alzheimer’s Dement.* **13**, 225–235 (2017).
- 462 14. Ghaznawi, R., Geerlings, M., Jaarsma-Coes, M., Hendrikse, J. & de Bresser, J.  
463 Association of White Matter Hyperintensity Markers on MRI and Long-term Risk of  
464 Mortality and Ischemic Stroke. *Neurology* 10.1212/WNL.0000000000011827 (2021).  
465 doi:10.1212/wnl.0000000000011827
- 466 15. Inglese, F. *et al.* Different phenotypes of neuropsychiatric systemic lupus  
467 erythematosus are related to a distinct pattern of structural changes on brain MRI. *Eur.*  
468 *Radiol.* (2021). doi:10.1007/s00330-021-07970-2
- 469 16. Ramirez, G. A. *et al.* Quantitative MRI adds to neuropsychiatric lupus diagnostics.  
470 *Rheumatology* 1–11 (2020). doi:10.1093/rheumatology/keaa779
- 471 17. Shastri, R. K. *et al.* MR Diffusion Tractography to Identify and Characterize  
472 Microstructural White Matter Tract Changes in Systemic Lupus Erythematosus  
473 Patients. *Acad. Radiol.* **23**, 1431–1440 (2016).

- 474 18. Danelakis, A., Theoharis, T. & Verganelakis, D. A. Survey of automated multiple  
475 sclerosis lesion segmentation techniques on magnetic resonance imaging. *Comput.*  
476 *Med. Imaging Graph.* **70**, 83–100 (2018).
- 477 19. Caligiuri, M. E. *et al.* Automatic Detection of White Matter Hyperintensities in Healthy  
478 Aging and Pathology Using Magnetic Resonance Imaging: A Review.  
479 *Neuroinformatics* **13**, 261–276 (2015).
- 480 20. Heinen, R. *et al.* Performance of five automated white matter hyperintensity  
481 segmentation methods in a multicenter dataset. *Scientific Reports* **9**, 1–12 (2019).
- 482 21. de Sitter, A. *et al.* Performance of five research-domain automated WM lesion  
483 segmentation methods in a multi-center MS study. *Neuroimage* **163**, 106–114 (2017).
- 484 22. Vanderbecq, Q. *et al.* Comparison and validation of seven white matter hyperintensities  
485 segmentation software in elderly patients. *NeuroImage Clin.* **27**, (2020).
- 486 23. Zirkzee, E. J. M. *et al.* Prospective study of clinical phenotypes in neuropsychiatric  
487 systemic lupus erythematosus; Multidisciplinary approach to diagnosis and therapy. *J.*  
488 *Rheumatol.* **39**, 2118–2126 (2012).
- 489 24. Monahan, R. C. *et al.* Mortality in patients with systemic lupus erythematosus and  
490 neuropsychiatric involvement: A retrospective analysis from a tertiary referral center in  
491 the Netherlands. *Lupus* **29**, 1892–1901 (2020).
- 492 25. Hanly, J. G. *et al.* Neuropsychiatric events at the time of diagnosis of systemic lupus  
493 erythematosus: An international inception cohort study. *Arthritis Rheum.* **56**, 265–273  
494 (2007).
- 495 26. Liang, M. H. *et al.* The American College of Rheumatology nomenclature and case  
496 definitions for neuropsychiatric lupus syndromes. *Arthritis Rheum.* **42**, 599–608  
497 (1999).
- 498 27. Hochberg, M. C. Updating the American College of Rheumatology revised criteria for  
499 the classification of systemic lupus erythematosus. *Arthritis Rheum.* **40**, 1725 (1997).
- 500 28. Gladman, D. D., Ibañez, D. & Urowltz, M. B. Systemic lupus erythematosus disease  
501 activity index 2000. *J. Rheumatol.* **29**, 288–291 (2002).
- 502 29. Petri, M. *et al.* Derivation and validation of the systemic lupus international  
503 collaborating clinics classification criteria for systemic lupus erythematosus. *Arthritis*  
504 *Rheum.* **64**, 2677–2686 (2012).
- 505 30. Ward, J. H. Hierarchical Grouping to Optimize an Objective Function. *J. Am. Stat.*  
506 *Assoc.* **58**, 236–244 (1963).
- 507 31. Pedregosa, F. *et al.* Scikit-learn: Machine Learning in Python. *J. Mach. Learn. Res.* **12**,  
508 2825–2830 (2012).
- 509 32. Rousseeuw, P. J. Silhouettes: A graphical aid to the interpretation and validation of  
510 cluster analysis. *J. Comput. Appl. Math.* **20**, 53–65 (1987).
- 511 33. Caliński, T. & Harabasz, J. A Dendrite Method For Cluster Analysis. *Commun. Stat.* **3**,  
512 1–27 (1974).
- 513 34. Virtanen, P. *et al.* SciPy 1.0: fundamental algorithms for scientific computing in  
514 Python. *Nat. Methods* **17**, 261–272 (2020).
- 515 35. Seabold, S. & Perktold, J. Statsmodels: Econometric and Statistical Modeling with  
516 Python. in 92–96 (2010). doi:10.25080/Majora-92bf1922-011
- 517 36. Jaarsma-Coes, M. G. *et al.* MRI phenotypes of the brain are related to future stroke and  
518 mortality in patients with manifest arterial disease: The SMART-MR study. *J. Cereb.*  
519 *Blood Flow Metab.* (2018). doi:10.1177/0271678X18818918
- 520 37. Kant, I. M. J. *et al.* Preoperative MRI brain phenotypes are related to postoperative  
521 delirium in older individuals. *Neurobiol. Aging* **101**, 247–255 (2021).
- 522 38. Schmidt, P. *et al.* An automated tool for detection of FLAIR-hyperintense white-matter  
523 lesions in Multiple Sclerosis. *Neuroimage* **59**, 3774–3783 (2012).

- 524 39. Pego-Reigosa, J. M. *et al.* Relationship between damage clustering and mortality in  
525 systemic lupus erythematosus in early and late stages of the disease: Cluster analyses in  
526 a large cohort from the Spanish Society of Rheumatology Lupus Registry. *Rheumatol.*  
527 *(United Kingdom)* **55**, 1243–1250 (2016).
- 528 40. Zollars, E. *et al.* Clinical application of a modular genomics technique in systemic  
529 lupus erythematosus: Progress towards precision medicine. *Int. J. Genomics* **2016**,  
530 (2016).
- 531 41. To, C. H. & Petri, M. Is antibody clustering predictive of clinical subsets and damage  
532 in systemic lupus erythematosus? *Arthritis Rheum.* **52**, 4003–4010 (2005).
- 533 42. Nystedt, J. *et al.* Altered white matter microstructure in lupus patients: A diffusion  
534 tensor imaging study. *Arthritis Res. Ther.* **20**, 1–11 (2018).
- 535 43. Costallat, B. L. *et al.* Brain diffusion tensor MRI in systematic lupus erythematosus: A  
536 systematic review. *Autoimmun. Rev.* **17**, 36–43 (2018).
- 537 44. Jung, R. E. *et al.* White matter correlates of neuropsychological dysfunction in  
538 systemic Lupus Erythematosus. *PLoS One* **7**, 1–6 (2012).
- 539 45. Lampe, L. *et al.* Lesion location matters: The relationships between white matter  
540 hyperintensities on cognition in the healthy elderly. *J. Cereb. Blood Flow Metab.* **39**,  
541 36–43 (2017).
- 542 46. Niida, R. *et al.* Aberrant Anterior Thalamic Radiation Structure in Bipolar Disorder: A  
543 Diffusion Tensor Tractography Study. *Front. Psychiatry* **9**, 522 (2018).
- 544 47. Calderón, J. *et al.* Impact of cognitive impairment, depression, disease activity, and  
545 disease damage on quality of life in women with systemic lupus erythematosus. *Scand.*  
546 *J. Rheumatol.* **46**, 273–280 (2017).
- 547 48. KA, C. *et al.* Mean diffusivity and fractional anisotropy as indicators of disease and  
548 genetic liability to schizophrenia. *J. Psychiatr. Res.* **45**, 980–988 (2011).
- 549 49. C, G. *et al.* Forceps minor damage and co-occurrence of depression and fatigue in  
550 multiple sclerosis. *Mult. Scler.* **20**, 1633–1640 (2014).
- 551 50. M, D. *et al.* Strategic role of frontal white matter tracts in vascular cognitive  
552 impairment: a voxel-based lesion-symptom mapping study in CADASIL. *Brain* **134**,  
553 2366–2375 (2011).
- 554 51. Magro-Checa, C. *et al.* Value of multidisciplinary reassessment in attribution of  
555 neuropsychiatric events to systemic lupus erythematosus: Prospective data from the  
556 Leiden NPSLE cohort. *Rheumatol. (United Kingdom)* **56**, 1676–1683 (2017).
- 557 52. Postal, M., Lapa, A. T., Reis, F., Rittner, L. & Appenzeller, S. Magnetic resonance  
558 imaging in neuropsychiatric systemic lupus erythematosus: Current state of the art and  
559 novel approaches. *Lupus* **26**, 517–521 (2017).
- 560 53. Ercan, E. *et al.* A multimodal MRI approach to identify and characterize  
561 microstructural brain changes in neuropsychiatric systemic lupus erythematosus.  
562 *NeuroImage Clin.* **8**, 337–344 (2015).
- 563
- 564

565 **AUTHOR CONTRIBUTIONS**

566 **TR:** Software, Data curation, Formal analysis, Visualization, Roles/Writing – original draft.  
567 **FI:** Data curation, Visualization, Formal analysis, Roles/Writing – original draft. **JdB:**  
568 Roles/Writing – original draft, Validation. **PM:** Data curation, Software, Writing – review and  
569 editing. **AJ:** Resources, Validation, Writing – review and editing. **AB:** Resources, Validation,  
570 Writing – review and editing. **MN:** Conceptualization, Validation, Writing – review and  
571 editing. **LK:** Conceptualization, Validation, Writing – review and editing. **JL:** Data curation,  
572 Software, Writing – review and editing. **GMSB:** Resources, Validation, Writing – review and  
573 editing. **TWJH:** Resources, Validation, Writing – review and editing. **MAvB:** Validation,  
574 Writing – review and editing, **OS:** Conceptualization, Software, Writing – review and editing.  
575 **IR:** Funding acquisition, Supervision, Project administration, Roles/Writing – original draft.  
576 **PCS:** Funding acquisition, Supervision, Project administration, Roles/Writing – original draft.  
577

578 **DATA AVAILABILITY STATEMENT**

579 Under General Data Protection Regulation (GDPR) restrictions, the MRI and other patient data  
580 cannot be made publicly available. Each of the two sites involved in this study (Lund  
581 University, Leiden University Medical Center) can share anonymized data with individual sites  
582 following an appropriate data transfer agreement (DTA). Under such agreement, each site  
583 (Lund, Leiden) will share only their own data with the signing site. Requests for DTA should  
584 be sent to Pia Sundgren (Lund University, [pia.sundgren@med.lu.se](mailto:pia.sundgren@med.lu.se)) or Itamar Ronen (Leiden  
585 University Medical Center, [i.ronen@lumc.nl](mailto:i.ronen@lumc.nl)).

586 The code used for data preprocessing and cluster analysis can be found in the following GitHub  
587 repository: [https://github.com/TheoRum/manuscript\\_WMH\\_SLE](https://github.com/TheoRum/manuscript_WMH_SLE)  
588

589 **CONFLICT OF INTEREST STATEMENT**

590 The authors declare that the research was conducted in the absence of any commercial or  
591 financial relationships that could be construed as a potential conflict of interest.  
592

593 **ACKNOWLEDGEMENTS**

594 The study was supported by funding by Regional Research funds (RegSkane 625631), SUS  
595 Foundation and Donation funds (PCS), Alfred Österlund foundation (PCS), Swedish  
596 Rheumatism Association R-56371 (PCS), King Gustaf V's 80-year foundation (FAI-2017-0341  
597 and FAI-2019-0559) (PCS).

598 The funding sources had no involvement in the study design, in the collection, analysis and  
599 interpretation of data, in the writing of the report and in the decision to submit the article for  
600 publication.  
601

602 **ETHICS STATEMENT**

603 All patients included in this study signed informed consent and it was approved by the Leiden-  
604 The Hague-Delft, The Netherlands, ethics approval committee (registration number P07.177)  
605 and the Regional Ethical Review Board in Lund, Sweden (#2012/4, #2014/748).  
606  
607  
608

609 **TABLE**

610

611 **Table 1. Demographic and clinical data across the two site cohorts.** Data are represented as  
 612 number (percentage) or median (10-90 percentile). Differences between Leiden and Lund  
 613 cohort are expressed in p-value and calculated for nominal variables with Chi-square tests (sex)  
 614 and for continuous variables, based on their not-normally distribution, with Mann-Whitney U  
 615 tests.

616 NPSLE= neuropsychiatric systemic lupus erythematosus; SDI= systemic lupus international  
 617 collaborating clinics damage index; SLEDAI-2K= systemic lupus erythematosus disease  
 618 activity index 2000; ACR= American College of Rheumatology.

619

620 \*= p value<0.05

621

|                                 | <b>Leiden</b>    | <b>Lund</b>      | <b>Leiden vs Lund<br/>p-value</b> |
|---------------------------------|------------------|------------------|-----------------------------------|
| <b>No. of subjects</b>          | 152              | 69               |                                   |
| <b>Non-NPSLE</b>                | 115              | 27               |                                   |
| <b>NPSLE</b>                    | 37               | 42               |                                   |
| <b>FLAIR 3D</b>                 | 53 (34%)         | 0 (0%)           |                                   |
| <b>sex female</b>               | 138 (90%)        | 69 (100%)        | <b>0.021*</b>                     |
| <b>age</b>                      | 42 (25-58)       | 37.5 (24-47)     | <b>0.002*</b>                     |
| <b>disease duration (years)</b> |                  |                  |                                   |
| non-NPSLE                       | 6.6 (0.4-17.4)   | 9.5 (1.0-20.0)   | 0.087                             |
| NPSLE                           | 2.5 (0.1-17.5)   | 10.0 (1.0-22.6)  | <b>0.001*</b>                     |
| <b>age of disease onset</b>     |                  |                  |                                   |
| non-NPSLE                       | 33.1 (18.6-52.8) | 24.5 (15.5-37.0) | <b>0.000*</b>                     |
| NPSLE                           | 31.5 (20.3-51.1) | 24.0 (15.0-37.8) | <b>0.006*</b>                     |
| <b>SDI score</b>                |                  |                  |                                   |
| non-NPSLE                       | 0 (0-2)          | 0 (0-2)          | <b>0.044*</b>                     |
| NPSLE                           | 1 (0-2)          | 0 (0-2)          | <b>0.045*</b>                     |
| <b>SLEDAI2k score</b>           |                  |                  |                                   |
| non-NPSLE                       | 4 (0-10)         | 2 (0-4)          | <b>0.006*</b>                     |
| NPSLE                           | 6 (0-20)         | 2 (0-4)          | <b>0.000*</b>                     |
| <b>ACR criteria</b>             |                  |                  |                                   |
| non-NPSLE                       | 5 (3.4-7.0)      | 6 (4.6-8.0)      | <b>0.003*</b>                     |
| NPSLE                           | 5 (4.0-6.4)      | 5 (4.0-7.0)      | 0.094                             |
| <b>WMH volume in ml</b>         |                  |                  |                                   |
| non-NPSLE                       | 0.102 (0.0-2.3)  | 0.018 (0.0-0.3)  | <b>0.031*</b>                     |
| NPSLE                           | 0.353 (0.0-6.2)  | 0.057 (0.0-0.3)  | <b>0.000*</b>                     |
| <b>WMH number</b>               |                  |                  |                                   |
| non-NPSLE                       | 2 (0.0-12.8)     | 1 (0.0-6.0)      | 0.073                             |
| NPSLE                           | 4 (0.0-16.8)     | 2 (0.0-6.8)      | <b>0.000*</b>                     |

622

623



624 **FIGURES**  
625

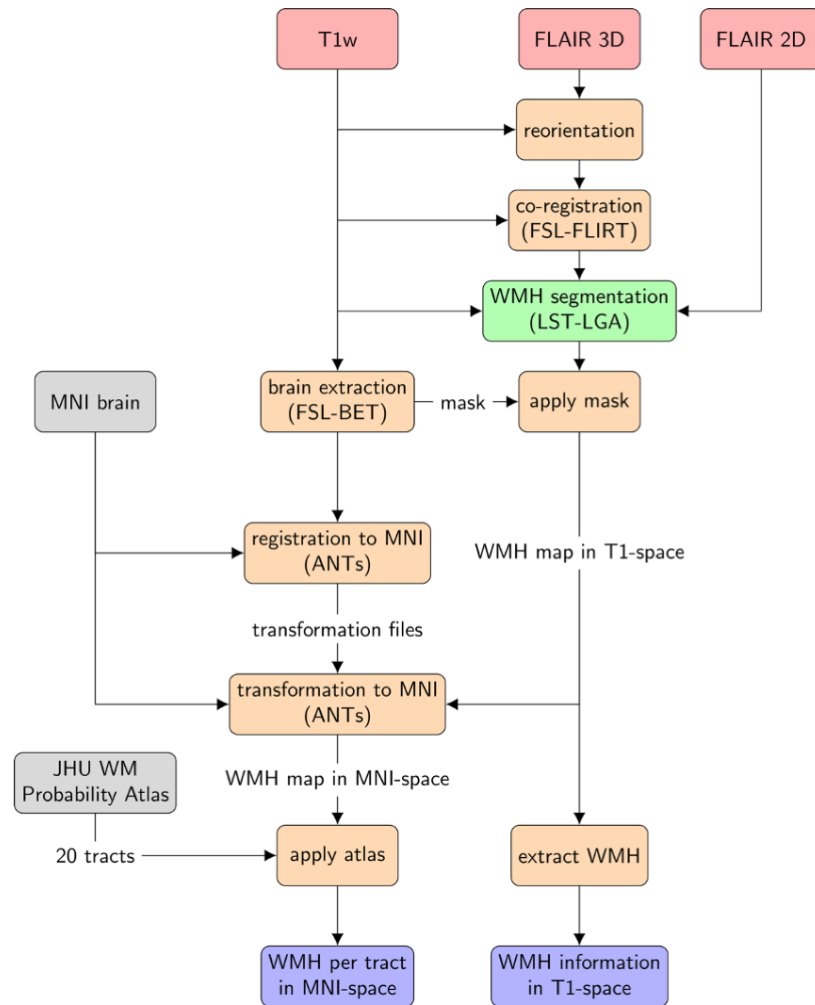

626  
627 **Figure 1. Preprocessing workflow.** Workflow of the fully automated approach. 3D-FLAIR  
628 images are reoriented and co-registered to the T<sub>1</sub>-weighted (T1w) before WMH segmentation.  
629 White matter hyperintensities (WMH) segmentation is performed with the Lesion  
630 Segmentation Toolbox-Lesion Growth Algorithm (LST-LGA) using T1w and FLAIR images.  
631 The volume and number of WMH are extracted from the WMH maps in T1-space. The WMH  
632 probability maps are transformed to Montreal Neurological Institute (MNI) space by applying  
633 the transformation from the T1w images. Those maps are masked by the Johns Hopkins  
634 University (JHU) white matter (WM) probability atlas to obtain the tract specific WMH  
635 volumes. To quantitatively assign WMH to specific WM tracts the probability values of  
636 superimposed voxels on the lesion map and the WM tract are multiplied and the resulting  
637 product is summed over the entire tract.  
638 FLAIR= fluid-attenuated inversion recovery; FSL= FMRIB Software Library; FLIRT= Linear  
639 Image Registration Tool; BET= Brain Extraction Tool; ANTs= Advanced Normalization Tools  
640  
641

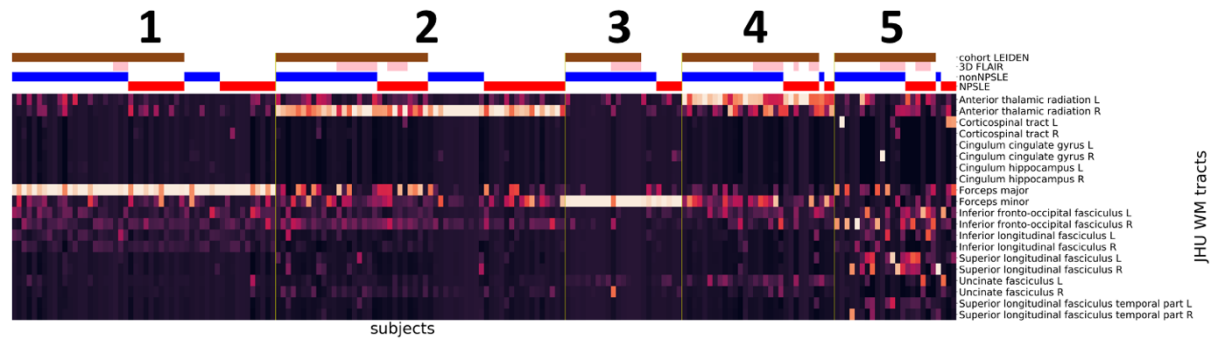

642  
643  
644  
645  
646  
647  
648  
649  
650  
651  
652

**Figure 2. Cluster analysis on the entire SLE cohort.** Heatmaps showing the 5 different MRI subtypes after the hierarchical clustering with the L2-normalization was performed. Subjects are shown on the x-axis and the Johns Hopkins University (JHU) white matter probability atlas tracts on the y-axis. The horizontal bars at the top show additional information: Leiden cohort (brown) complemented by the Lund cohort, 3D-FLAIR (pink) complemented by 2D-FLAIR, non-NPSLE (blue), NPSLE (red). FLAIR= fluid-attenuated inversion recovery; NPSLE= neuropsychiatric systemic lupus erythematosus.

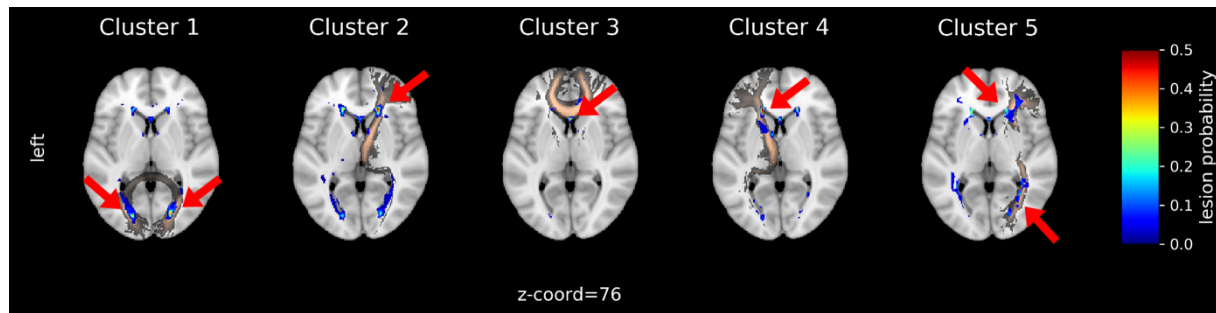

653  
654 **Figure 3. Lesion frequency map for each cluster in MNI-space.** WMH in cluster 1 can be  
655 mainly assigned to Forceps Major, cluster 2 to right Anterior Thalamic Radiation, cluster 3 to  
656 Forceps Minor and 4 to the left Anterior Thalamic Radiation. Cluster 5 shows a high WMH  
657 burden and can be assigned to the right inferior fronto-occipital fasciculus. Clusters are shown  
658 as lesion probabilities from 0.0 to 0.5 (color scale on the right). The main WMH corresponding  
659 to specific WM tracts (copper color) are emphasized with red arrows.  
660  
661

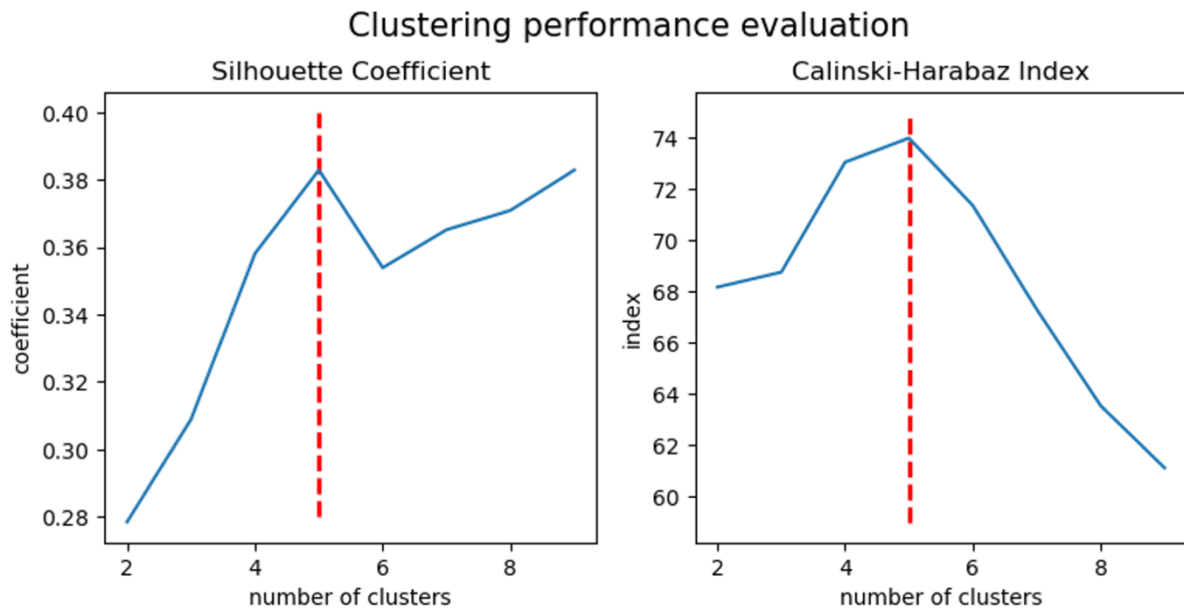

662  
663  
664  
665  
666  
667  
668  
669  
670  
671

**Figure 4. Clustering performance evaluation.** To determine the optimal number of clusters in the hierarchical cluster analysis a consensus of two different methods were used. The mean Silhouette Coefficient (on the left) is calculated over mean intra-cluster distance divided by the minimal inter-cluster distance to the nearest cluster. Positive values indicate a dense clustering whereas negative an incorrect clustering. The Calinski-Harabaz index (on the right) is the ratio of the sum of distances squared between and within the clusters. A high index indicated a dense and well separated cluster. Both methods indicate an optimal number of clusters of 5.

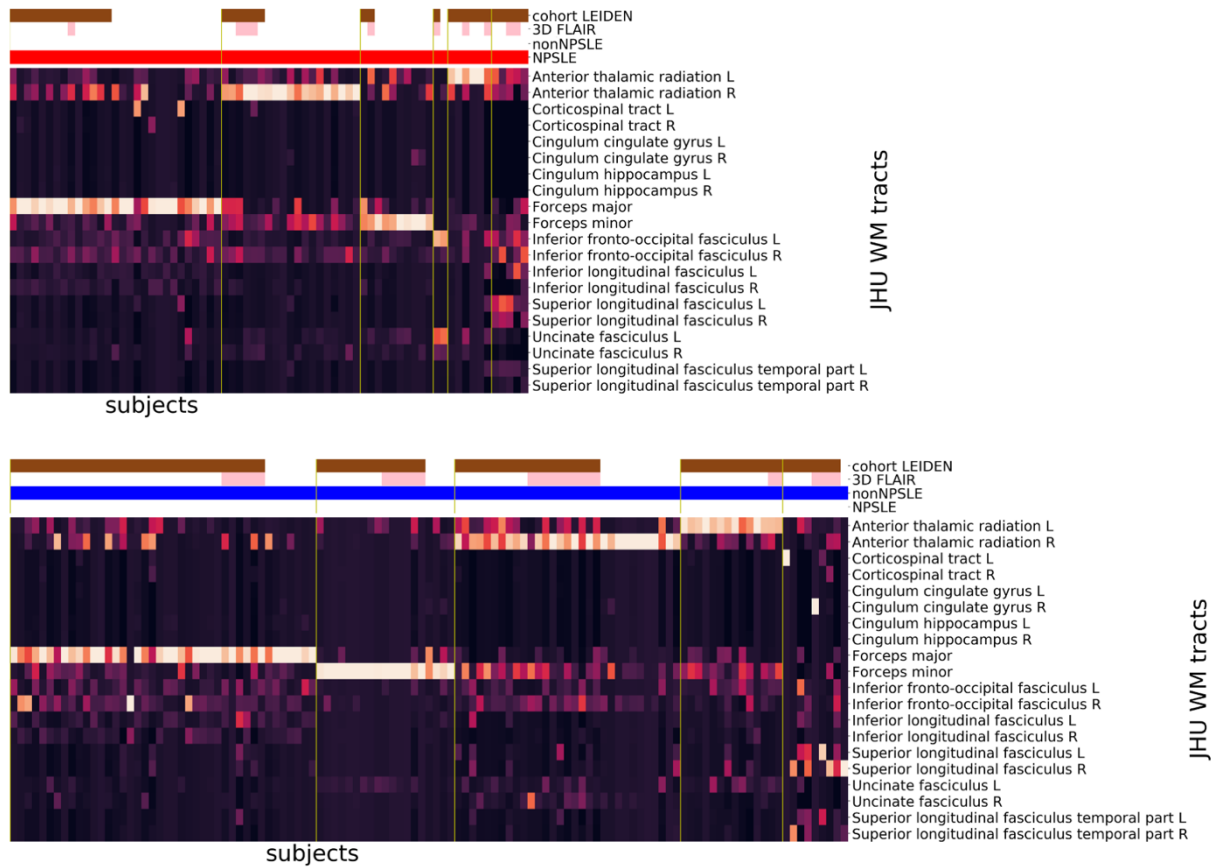

672  
673  
674  
675  
676  
677  
678  
679  
680

**Figure 5. Sensitivity analysis on NPSLE and non-NPSLE patients.** Cluster analysis on NPSLE patients (top) and on non-NPSLE patients (bottom). The horizontal bars at the top show additional information: Leiden cohort (brown) complemented by the Lund cohort, 3D-FLAIR (pink) complemented by 2D-FLAIR, non-NPSLE (blue), NPSLE (red). FLAIR= fluid-attenuated inversion recovery; NPSLE= neuropsychiatric systemic lupus erythematosus.

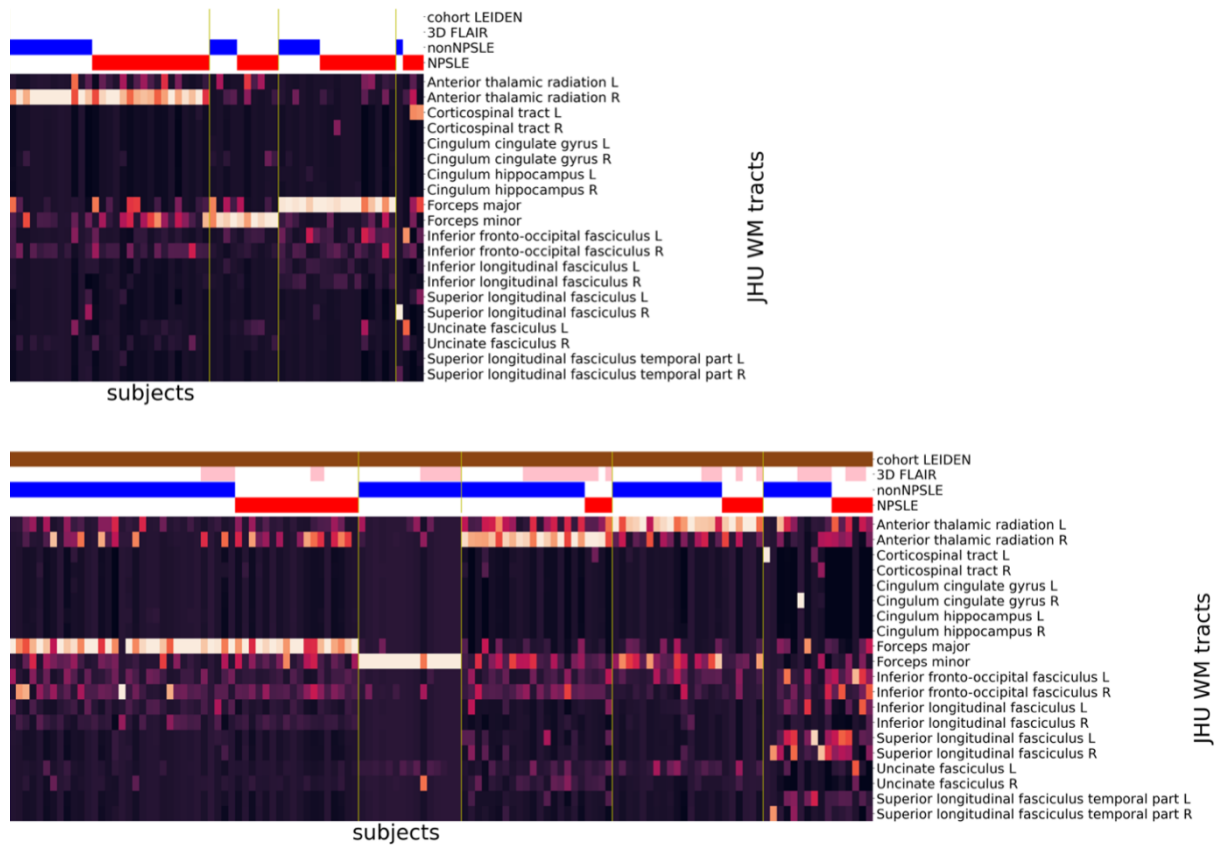

681  
 682 **Figure 6. Sensitivity analysis on each cohort separately.** Cluster analysis on Lund (top) and  
 683 Leiden cohort (bottom). The horizontal bars at the top show additional information: Leiden  
 684 cohort (brown) complemented by the Lund cohort, 3D-FLAIR (pink) complemented by 2D-  
 685 FLAIR, non-NPSLE (blue), NPSLE (red).

686 FLAIR= fluid-attenuated inversion recovery; NPSLE= neuropsychiatric systemic lupus  
 687 erythematosus

688  
 689

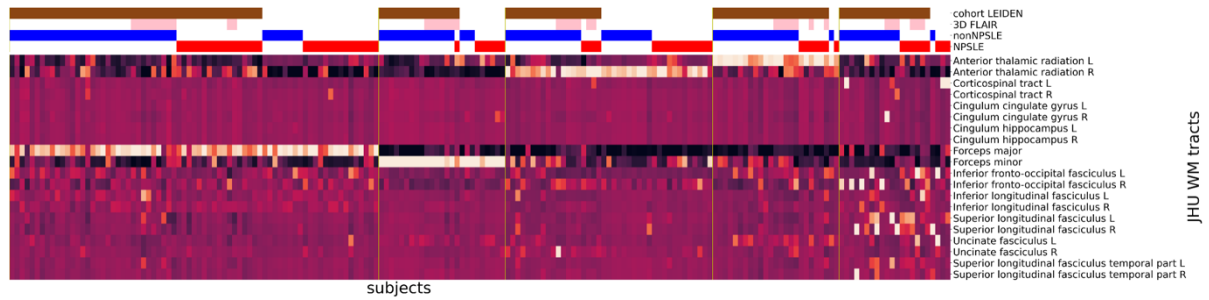

690  
691  
692  
693  
694  
695  
696  
697  
698  
699  
700

**Figure 7. Sensitivity Analysis using GLM.** Cluster analysis on the entire SLE cohort performed after L2 normalization and GLM model to correct for cohort, type of FLAIR, sex, age, disease duration. SDI-score, SLEDAI-2k-score and WMH total volume. The horizontal bars at the top show additional information: Leiden cohort (brown) complemented by the Lund cohort, 3D-FLAIR (pink) complemented by 2D-FLAIR, non-NPSLE (blue), NPSLE (red). GLM= General linear model; FLAIR= fluid-attenuated inversion recovery; NPSLE= neuropsychiatric systemic lupus erythematosus; SDI= systemic lupus international collaborating clinics damage index; SLEDAI-2K = systemic lupus erythematosus disease activity index 2000.
